# Supplementary material for: A Pharmacogenetic Discovery: Cystamine Protects Against Haloperidol-Induced Toxicity and Ischemic Brain Injury
Source: Oxford University Press journal article supplement (doi:10.1534/genetics.115.184648), 2016-03-19
Supplement: figures1.pdf [file figures1.pdf]

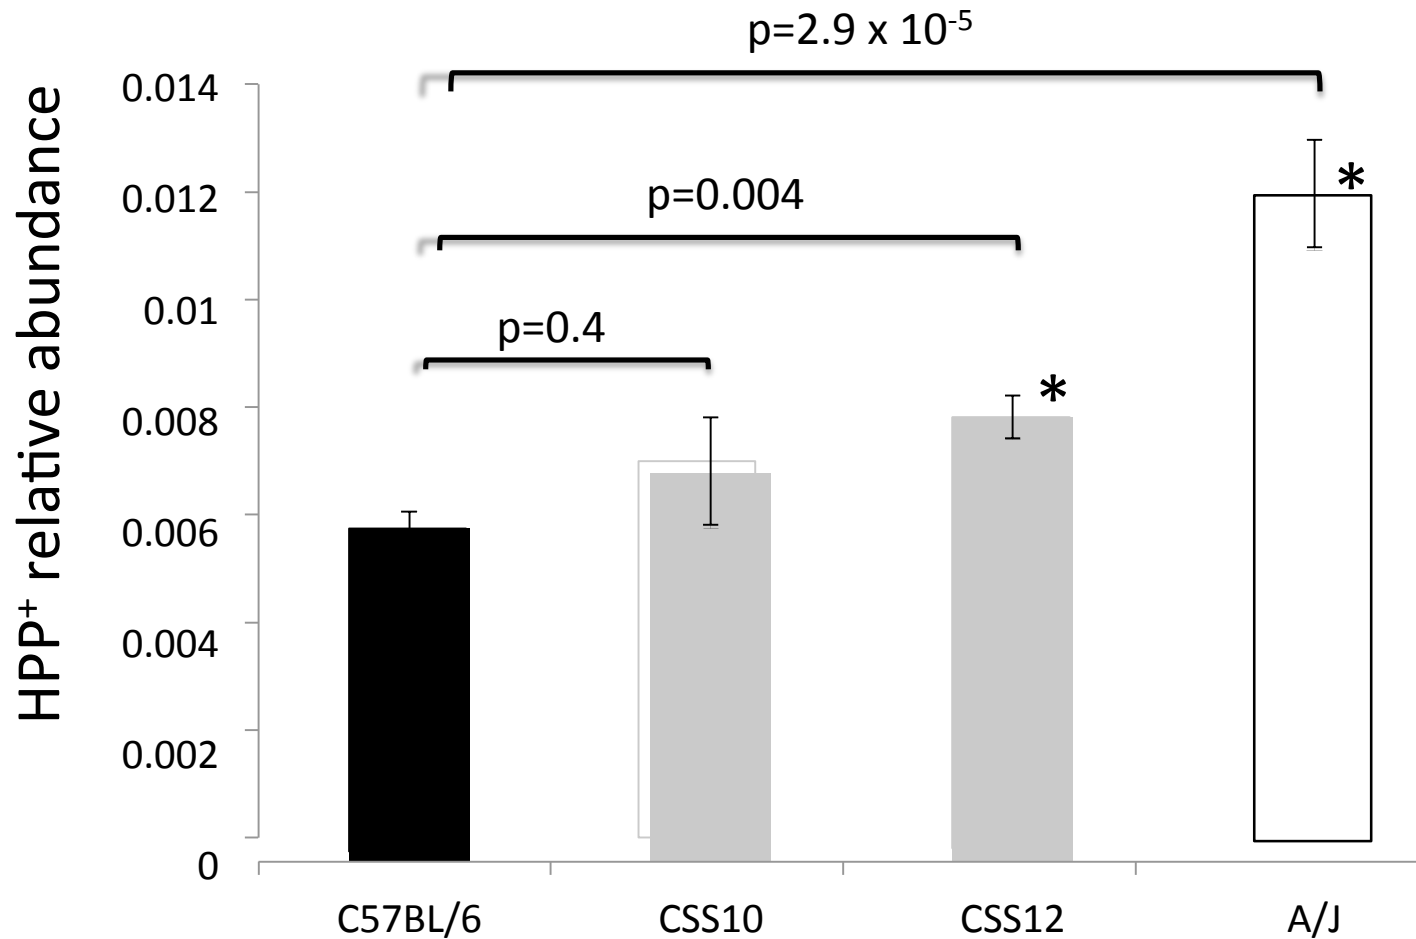

**Figure S1.** C57BL/6 (n=6), A/J (n=6), CSS10 (n=3) and CSS12 (n=8) mice were dosed with haloperidol (3 mg/kg/day) for 10 days, brain tissue was then harvested, and the amount of HPP<sup>+</sup> in brain tissue was measured. Each bar represents the average  $\pm$  SEM for each group. Relative to C57BL/6 brain tissue, the amount of HPP<sup>+</sup> in CSS10 brain tissue was not increased (p=0.4), while the amount of HPP<sup>+</sup> in A/J (p=2.9x10<sup>-5</sup>) and CSS12 (p=0.004) brain tissue was increased.
