# Supplementary material for: A Pharmacogenetic Discovery: Cystamine Protects Against Haloperidol-Induced Toxicity and Ischemic Brain Injury
Source: Oxford University Press journal article supplement (doi:10.1534/genetics.115.184648), 2016-03-19
Supplement: figures2.pdf [file figures2.pdf]

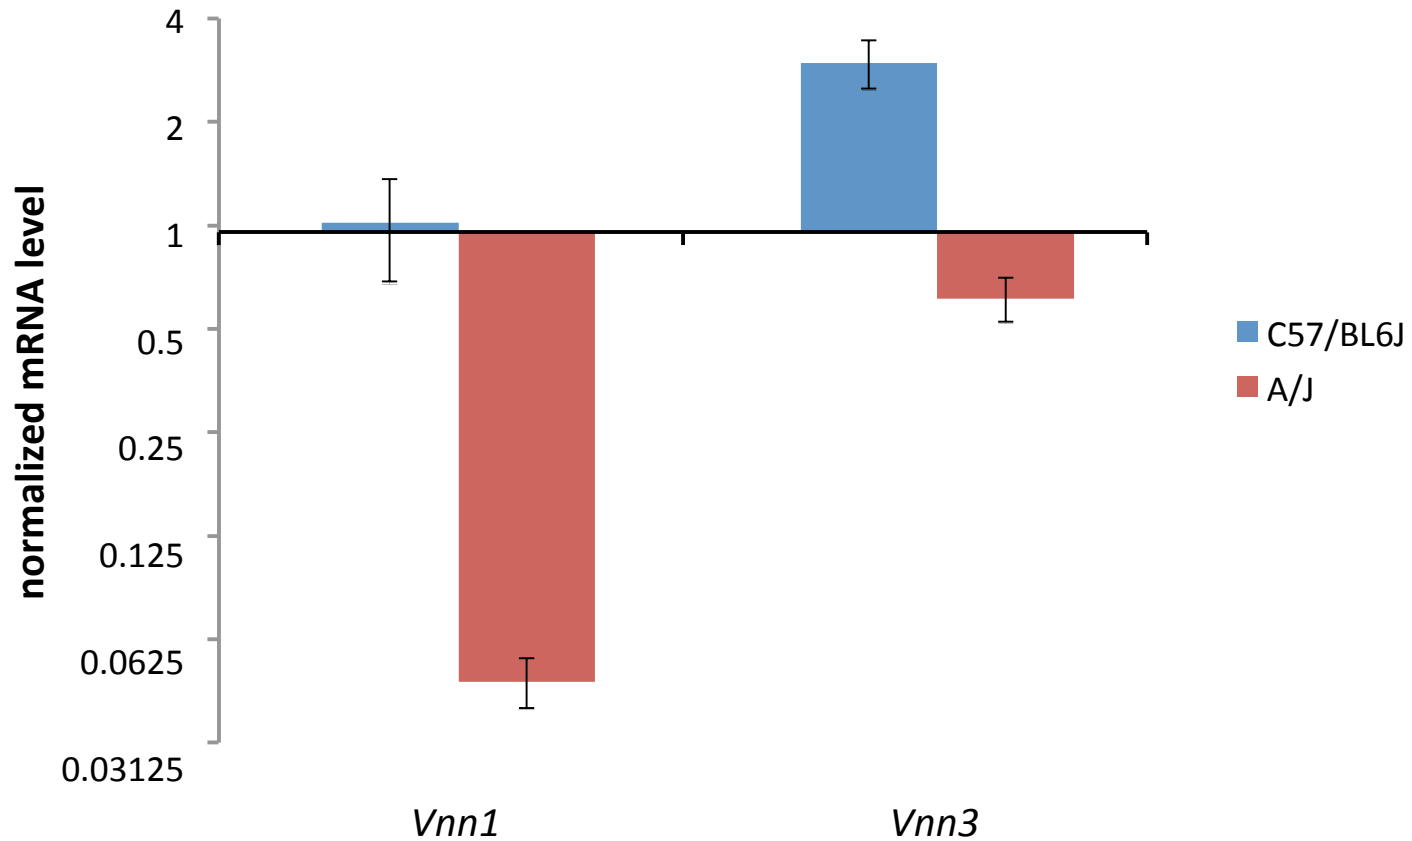

**Figure S2.** *Vnn1* and *Vnn3* mRNA levels in livers obtained from adult male A/J (n=2) and C57BL/6 (n=2) mice were measured by qRT-PCR. The normalized level of *Vnn1* mRNA in C57BL/6 liver ( $1.06 \pm 0.35$  mean  $\pm$  SE) is 20-fold higher than in A/J ( $0.054 \pm 0.009$ ) liver; while hepatic *Vnn3* mRNA in C57BL/6 ( $2.99 \pm 0.48$ ) is 5-fold higher than in A/J mice ( $0.65 \pm 0.10$ ).
