# Supplementary material for: A Pharmacogenetic Discovery: Cystamine Protects Against Haloperidol-Induced Toxicity and Ischemic Brain Injury
Source: Oxford University Press journal article supplement (doi:10.1534/genetics.115.184648), 2016-03-19
Supplement: figures3.pdf [file figures3.pdf]

Fig S3A

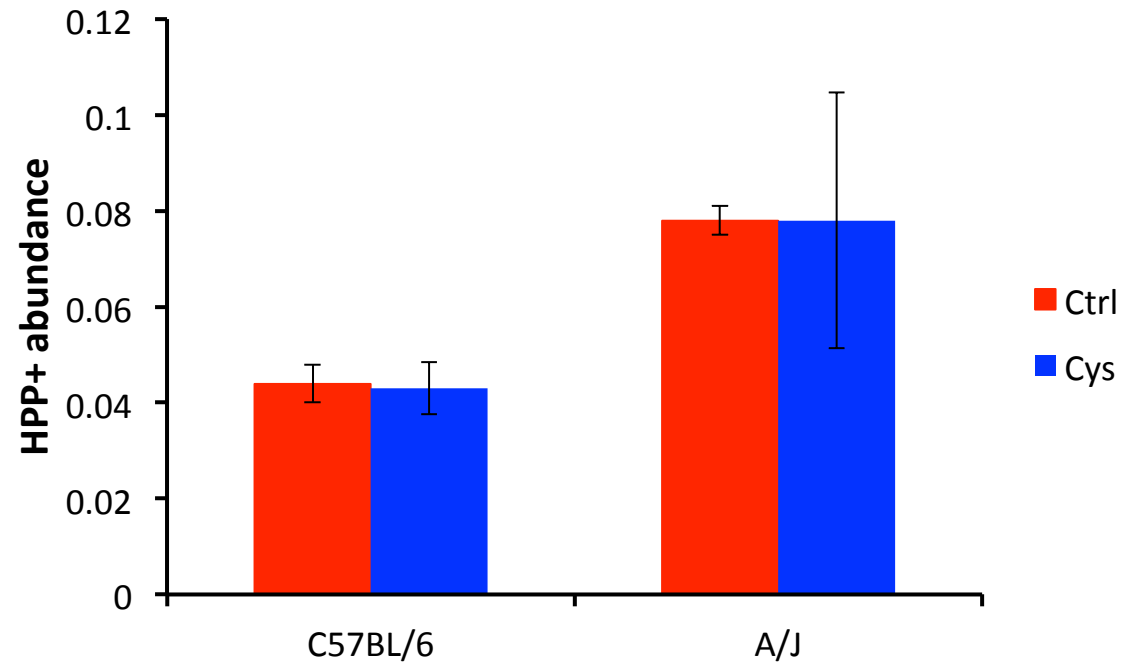

Fig S3B

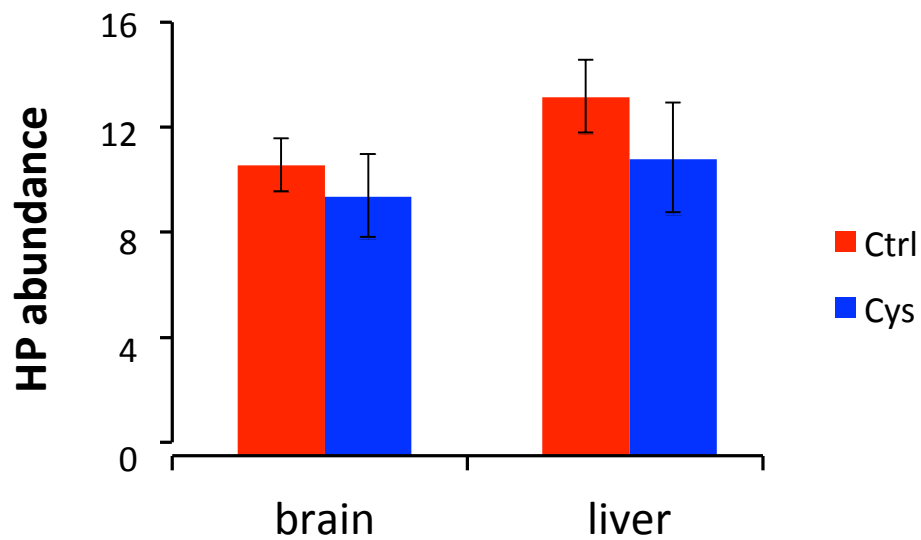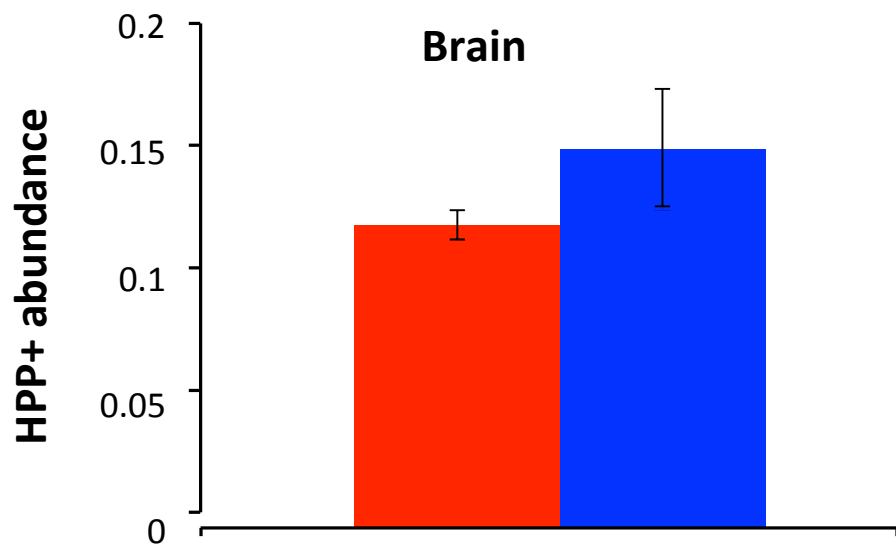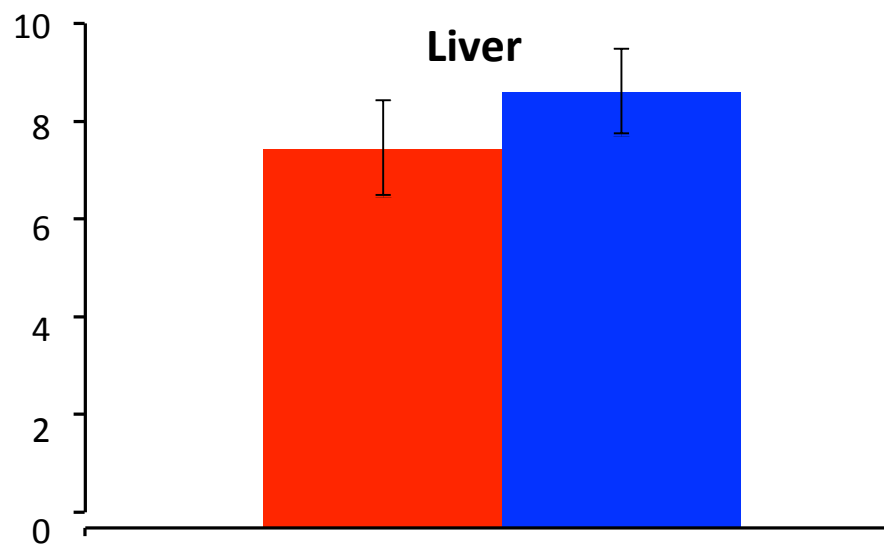

**Figure S3.** Cystamine treatment does not reduce HPP<sup>+</sup> levels in haloperidol-treated mice. **(A)** C57BL/6 and A/J mice (n=4 per group) were treated with vehicle or cystamine (10mg/kg/day IP) for 3 days, followed by 4 days of treatment with haloperidol (10 mg/kg/day IP) in the absence or presence of cystamine (10 mg/kg/day IP). Four hours after the last dose of haloperidol, the amount of the oxidative metabolite of haloperidol (HPP<sup>+</sup>) in brain was measured. Cystamine co-administration did not alter the amount of HPP<sup>+</sup> present in brain tissue obtained from A/J (p-value = 0.98) mice. **(B)** A/J mice were treated with vehicle or cystamine (10 mg/kg IP) for 2 days, followed by treatment with haloperidol (10 mg/kg/day IP) in the absence or presence of cystamine (10 mg/kg IP) for 2 more days. Four hours after last injection of haloperidol, the amount of haloperidol (HP) and its oxidative metabolite (HPP<sup>+</sup>) was measured in brain and liver tissue. The hepatic level of HPP<sup>+</sup> was also not reduced by cystamine co-administration (p-value=0.42). Each bar represents the average  $\pm$  SEM for each indicated group.
