# Supplementary material for: A Pharmacogenetic Discovery: Cystamine Protects Against Haloperidol-Induced Toxicity and Ischemic Brain Injury
Source: Oxford University Press journal article supplement (doi:10.1534/genetics.115.184648), 2016-03-19
Supplement: tables2.pdf [file tables2.pdf]

**Table S2.** Haloperidol-induced gene expression changes in striatal tissue of A/J mice that were reversed by cystamine co-administration. Genes whose mRNAs had a haloperidol-induced absolute fold change >1.5 in their striatal expression level (relative to untreated control), and with an adjusted p-value <0.1 in the co-variant models used for analyzing the microarray data, are listed. The fold change (FC) and p-values for each of the indicated pair-wise comparisons, as well as the quantile-normalized raw intensity microarray data for each gene in the indicated treatment group are shown. The treatment groups were: Hal: haloperidol; Cys+Hal: cystamine and haloperidol co-administration; ctrl: vehicle control.

| Symbol        | A/J_<br>Hal_vs_Ctrl |         | A/J_<br>Cys+Hal_vs_Ctrl |         | C57BL/6_<br>Hal_vs_Ctrl |         | Normalized Intensity |         |            |              |             |
|---------------|---------------------|---------|-------------------------|---------|-------------------------|---------|----------------------|---------|------------|--------------|-------------|
|               | FC                  | p_value | FC                      | p_value | FC                      | p_value | A/J_Ctrl             | A/J_Hal | A/J_CysHal | C57BL/6_Ctrl | C57BL/6_Hal |
| 1110059M19Rik | 0.58                | 0.02    | 0.62                    | 0.04    | 1.16                    | 0.66    | 6.62                 | 5.84    | 5.93       | 6.48         | 6.69        |
| 2310022B05Rik | 0.67                | 0.08    | 0.78                    | 0.27    | 0.93                    | 0.57    | 11.18                | 10.60   | 10.83      | 11.06        | 10.95       |
| 2310051E17Rik | 1.51                | 0.03    | 1.60                    | 0.02    | 1.03                    | 0.85    | 8.74                 | 9.34    | 9.42       | 9.01         | 9.05        |
| 2810046M22Rik | 0.59                | 0.08    | 0.63                    | 0.12    | 1.67                    | 0.24    | 7.32                 | 6.56    | 6.65       | 6.81         | 7.54        |
| 2900017F05Rik | 0.54                | 0.03    | 0.71                    | 0.19    | 1.29                    | 0.30    | 7.56                 | 6.66    | 7.06       | 7.73         | 8.10        |
| 3110035E14Rik | 3.63                | 0.06    | 1.87                    | 0.32    | 1.91                    | 0.29    | 9.18                 | 11.03   | 10.08      | 9.29         | 10.22       |
| 4632428D17Rik | 1.51                | 0.07    | 1.16                    | 0.47    | 1.30                    | 0.12    | 5.92                 | 6.51    | 6.14       | 5.78         | 6.16        |
| 4933437K13Rik | 0.66                | 0.01    | 0.81                    | 0.11    | 0.90                    | 0.36    | 7.37                 | 6.78    | 7.07       | 7.34         | 7.20        |
| 9130024F11Rik | 2.88                | 0.08    | 1.71                    | 0.35    | 1.94                    | 0.26    | 6.55                 | 8.07    | 7.32       | 6.29         | 7.25        |
| 9530064J02    | 1.52                | 0.10    | 1.22                    | 0.41    | 1.47                    | 0.16    | 12.09                | 12.69   | 12.37      | 11.58        | 12.13       |
| A130082M07Rik | 0.58                | 0.09    | 0.72                    | 0.28    | 1.00                    | 0.98    | 7.14                 | 6.34    | 6.65       | 6.35         | 6.34        |
| A130090K04Rik | 2.11                | 0.11    | 1.52                    | 0.35    | 1.58                    | 0.31    | 7.53                 | 8.61    | 8.13       | 7.52         | 8.17        |
| A430103B12Rik | 0.59                | 0.03    | 0.74                    | 0.17    | 1.07                    | 0.69    | 7.94                 | 7.18    | 7.50       | 7.64         | 7.73        |
| A830021M18    | 1.74                | 0.02    | 1.13                    | 0.56    | 1.27                    | 0.20    | 6.76                 | 7.56    | 6.95       | 6.42         | 6.76        |
| Adamtsl4      | 0.65                | 0.05    | 0.83                    | 0.36    | 0.81                    | 0.11    | 8.02                 | 7.41    | 7.76       | 8.09         | 7.79        |
| Al875142      | 1.70                | 0.07    | 1.27                    | 0.39    | 1.26                    | 0.35    | 11.13                | 11.90   | 11.47      | 11.50        | 11.83       |
| Akr1c18       | 1.50                | 0.05    | 1.30                    | 0.18    | 1.31                    | 0.14    | 5.61                 | 6.20    | 5.98       | 5.67         | 6.06        |
| Alox12b       | 2.12                | 0.02    | 1.45                    | 0.22    | 1.53                    | 0.08    | 6.36                 | 7.44    | 6.90       | 6.29         | 6.90        |
| Anxa11        | 1.64                | 0.03    | 1.24                    | 0.30    | 1.28                    | 0.10    | 7.61                 | 8.33    | 7.92       | 7.56         | 7.92        |
| Aqp1          | 0.47                | 0.01    | 0.45                    | 0.01    | 1.47                    | 0.41    | 7.38                 | 6.29    | 6.24       | 6.84         | 7.40        |
| Arc           | 1.65                | 0.16    | 1.04                    | 0.90    | 0.60                    | 0.04    | 9.12                 | 9.85    | 9.19       | 9.74         | 9.01        |
| Arhgap15      | 1.85                | 0.05    | 1.29                    | 0.38    | 1.44                    | 0.23    | 6.12                 | 7.01    | 6.49       | 6.12         | 6.64        |
| Bmp3          | 1.53                | 0.07    | 1.07                    | 0.75    | 1.05                    | 0.71    | 5.93                 | 6.54    | 6.02       | 5.90         | 5.96        |
| C130074G19Rik | 1.83                | 0.04    | 1.24                    | 0.43    | 1.11                    | 0.38    | 6.90                 | 7.78    | 7.22       | 6.90         | 7.05        |
| C230057M02Rik | 2.07                | 0.04    | 1.41                    | 0.28    | 1.36                    | 0.18    | 6.72                 | 7.77    | 7.22       | 6.44         | 6.88        |
| C330006P03Rik | 2.34                | 0.10    | 1.84                    | 0.22    | 1.14                    | 0.71    | 9.99                 | 11.21   | 10.86      | 9.94         | 10.13       |

|               |      |      |      |      |      |      |       |       |       |       |       |
|---------------|------|------|------|------|------|------|-------|-------|-------|-------|-------|
| C630007B19Rik | 1.51 | 0.06 | 1.16 | 0.48 | 1.35 | 0.11 | 6.24  | 6.83  | 6.45  | 6.30  | 6.73  |
| Calm4         | 0.55 | 0.08 | 0.62 | 0.15 | 1.21 | 0.50 | 7.60  | 6.74  | 6.91  | 7.21  | 7.48  |
| Camk2a        | 1.73 | 0.11 | 1.27 | 0.46 | 1.21 | 0.47 | 10.60 | 11.39 | 10.94 | 10.53 | 10.80 |
| Camkk1        | 1.54 | 0.02 | 1.30 | 0.13 | 1.28 | 0.06 | 9.78  | 10.41 | 10.16 | 9.58  | 9.93  |
| Car14         | 0.63 | 0.01 | 0.71 | 0.04 | 1.05 | 0.69 | 8.28  | 7.61  | 7.78  | 8.33  | 8.41  |
| Ccdc3         | 1.96 | 0.00 | 1.28 | 0.19 | 1.48 | 0.01 | 8.63  | 9.60  | 8.99  | 8.43  | 8.99  |
| Cdh15         | 1.57 | 0.11 | 1.39 | 0.23 | 0.94 | 0.57 | 6.88  | 7.53  | 7.35  | 7.40  | 7.31  |
| Cdkn1a        | 1.51 | 0.01 | 1.78 | 0.00 | 1.48 | 0.04 | 7.57  | 8.16  | 8.40  | 7.11  | 7.67  |
| Cdkn1c        | 0.61 | 0.02 | 0.68 | 0.05 | 1.35 | 0.34 | 9.58  | 8.88  | 9.03  | 8.90  | 9.34  |
| Chrd          | 1.56 | 0.10 | 1.26 | 0.37 | 1.51 | 0.16 | 8.54  | 9.18  | 8.87  | 8.24  | 8.84  |
| Cit           | 0.54 | 0.06 | 0.80 | 0.46 | 1.01 | 0.89 | 8.27  | 7.38  | 7.94  | 8.01  | 8.03  |
| Cldn2         | 0.44 | 0.01 | 0.43 | 0.01 | 1.21 | 0.62 | 7.18  | 5.99  | 5.97  | 6.72  | 7.00  |
| Col8a1        | 0.67 | 0.04 | 0.72 | 0.09 | 1.33 | 0.21 | 6.92  | 6.34  | 6.45  | 6.66  | 7.08  |
| Col8a2        | 0.61 | 0.04 | 0.63 | 0.05 | 1.17 | 0.49 | 7.19  | 6.48  | 6.53  | 6.61  | 6.83  |
| Cox6a2        | 0.64 | 0.09 | 0.82 | 0.44 | 0.89 | 0.32 | 9.18  | 8.54  | 8.90  | 9.86  | 9.69  |
| Crhbp         | 1.94 | 0.03 | 1.51 | 0.16 | 1.97 | 0.03 | 8.53  | 9.49  | 9.12  | 8.27  | 9.25  |
| Ctgf          | 1.74 | 0.15 | 1.04 | 0.91 | 1.61 | 0.29 | 8.47  | 9.27  | 8.53  | 8.40  | 9.08  |
| D030006P03Rik | 0.63 | 0.05 | 0.82 | 0.37 | 0.88 | 0.28 | 6.44  | 5.77  | 6.16  | 6.42  | 6.23  |
| D230046H12Rik | 0.43 | 0.03 | 0.52 | 0.07 | 1.22 | 0.53 | 9.28  | 8.07  | 8.33  | 8.83  | 9.11  |
| Dgkg          | 1.59 | 0.11 | 1.23 | 0.45 | 1.14 | 0.38 | 10.12 | 10.79 | 10.42 | 10.18 | 10.36 |
| Dkk3          | 1.84 | 0.10 | 1.43 | 0.32 | 1.39 | 0.29 | 10.22 | 11.10 | 10.74 | 10.12 | 10.60 |
| E130012A19Rik | 2.52 | 0.08 | 1.68 | 0.30 | 1.64 | 0.33 | 9.05  | 10.39 | 9.80  | 8.91  | 9.62  |
| Enc1          | 1.61 | 0.11 | 1.25 | 0.42 | 1.30 | 0.30 | 11.93 | 12.61 | 12.25 | 11.61 | 11.99 |
| Enpp2         | 0.44 | 0.01 | 0.55 | 0.03 | 1.28 | 0.48 | 10.90 | 9.73  | 10.05 | 10.55 | 10.90 |
| Erdr1         | 0.70 | 0.08 | 1.08 | 0.69 | 0.42 | 0.37 | 10.35 | 9.84  | 10.46 | 10.69 | 9.44  |
| Extl1         | 1.80 | 0.10 | 1.41 | 0.31 | 1.24 | 0.21 | 8.11  | 8.96  | 8.61  | 7.68  | 7.99  |
| Fam131a       | 1.70 | 0.03 | 1.31 | 0.24 | 1.20 | 0.40 | 9.68  | 10.45 | 10.07 | 9.73  | 9.98  |
| Fam171a1      | 2.10 | 0.01 | 2.08 | 0.01 | 0.75 | 0.42 | 6.85  | 7.92  | 7.90  | 7.42  | 7.01  |
| Fhl2          | 2.46 | 0.06 | 1.57 | 0.31 | 1.56 | 0.28 | 7.65  | 8.95  | 8.31  | 7.69  | 8.33  |
| Folr1         | 0.37 | 0.01 | 0.38 | 0.02 | 1.29 | 0.60 | 7.76  | 6.34  | 6.38  | 7.17  | 7.54  |
| Fosb          | 1.88 | 0.02 | 1.46 | 0.14 | 1.06 | 0.68 | 7.37  | 8.28  | 7.91  | 7.34  | 7.43  |
| Gpr151        | 0.39 | 0.16 | 0.91 | 0.89 | 1.31 | 0.60 | 7.65  | 6.29  | 7.52  | 7.72  | 8.12  |
| Hcrt          | 0.26 | 0.17 | 0.90 | 0.91 | 0.79 | 0.83 | 7.74  | 5.80  | 7.58  | 8.43  | 8.08  |
| Hs3st2        | 1.86 | 0.07 | 1.26 | 0.47 | 1.26 | 0.43 | 6.56  | 7.45  | 6.89  | 6.62  | 6.95  |
| Igfbp6        | 2.68 | 0.10 | 1.65 | 0.38 | 1.02 | 0.96 | 7.02  | 8.44  | 7.74  | 7.69  | 7.72  |
| Inhba         | 2.21 | 0.04 | 1.79 | 0.12 | 1.24 | 0.37 | 7.50  | 8.65  | 8.35  | 7.73  | 8.04  |

|            |      |      |      |      |      |      |       |       |       |       |       |
|------------|------|------|------|------|------|------|-------|-------|-------|-------|-------|
| Irs2       | 0.59 | 0.04 | 0.87 | 0.57 | 1.10 | 0.58 | 9.51  | 8.74  | 9.32  | 9.15  | 9.29  |
| Islr2      | 2.22 | 0.01 | 1.70 | 0.06 | 1.52 | 0.15 | 8.18  | 9.34  | 8.95  | 7.98  | 8.58  |
| Itga11     | 1.54 | 0.00 | 1.15 | 0.26 | 1.04 | 0.68 | 6.11  | 6.73  | 6.31  | 6.34  | 6.40  |
| Itgb4      | 0.67 | 0.03 | 0.78 | 0.17 | 0.78 | 0.01 | 9.41  | 8.83  | 9.06  | 8.98  | 8.62  |
| Kcne2      | 0.41 | 0.01 | 0.42 | 0.01 | 1.06 | 0.91 | 7.49  | 6.19  | 6.24  | 7.28  | 7.36  |
| Klk6       | 0.65 | 0.11 | 0.83 | 0.47 | 0.68 | 0.02 | 8.12  | 7.50  | 7.86  | 8.48  | 7.92  |
| Lmo4       | 1.55 | 0.11 | 1.29 | 0.33 | 1.10 | 0.68 | 11.21 | 11.85 | 11.58 | 11.20 | 11.34 |
| Mas1       | 2.56 | 0.06 | 1.30 | 0.57 | 1.07 | 0.84 | 7.22  | 8.57  | 7.59  | 7.76  | 7.87  |
| Mpped1     | 1.95 | 0.11 | 1.22 | 0.62 | 1.33 | 0.45 | 10.54 | 11.50 | 10.82 | 10.14 | 10.55 |
| Ncor1      | 1.83 | 0.01 | 1.84 | 0.01 | 0.91 | 0.74 | 8.39  | 9.26  | 9.26  | 8.58  | 8.45  |
| Neurod2    | 3.87 | 0.03 | 2.01 | 0.21 | 2.43 | 0.15 | 7.13  | 9.09  | 8.14  | 7.01  | 8.29  |
| Nkx6-2     | 0.65 | 0.04 | 0.68 | 0.07 | 0.72 | 0.05 | 8.36  | 7.73  | 7.81  | 8.61  | 8.15  |
| Nptx1      | 2.21 | 0.04 | 1.45 | 0.30 | 1.89 | 0.06 | 7.19  | 8.33  | 7.72  | 6.79  | 7.71  |
| Nrgn       | 2.64 | 0.10 | 1.70 | 0.35 | 0.85 | 0.69 | 10.83 | 12.23 | 11.59 | 11.71 | 11.47 |
| Pcdh17     | 0.63 | 0.06 | 0.83 | 0.39 | 0.98 | 0.93 | 9.87  | 9.21  | 9.60  | 9.71  | 9.68  |
| Peg3       | 0.57 | 0.02 | 0.83 | 0.39 | 1.09 | 0.48 | 9.81  | 8.99  | 9.53  | 9.71  | 9.84  |
| Plekha2    | 1.65 | 0.01 | 1.27 | 0.20 | 1.23 | 0.25 | 9.30  | 10.03 | 9.64  | 9.29  | 9.59  |
| Plekhg5    | 1.61 | 0.05 | 1.31 | 0.23 | 1.32 | 0.14 | 8.66  | 9.35  | 9.06  | 8.37  | 8.77  |
| Pmch       | 0.10 | 0.08 | 0.46 | 0.52 | 1.60 | 0.66 | 9.61  | 6.32  | 8.50  | 9.26  | 9.94  |
| Prss12     | 1.99 | 0.04 | 1.30 | 0.40 | 1.57 | 0.11 | 6.72  | 7.71  | 7.09  | 6.34  | 6.98  |
| Prss35     | 1.78 | 0.01 | 1.44 | 0.07 | 1.42 | 0.01 | 6.48  | 7.31  | 7.01  | 5.93  | 6.43  |
| Ptk2b      | 1.94 | 0.06 | 1.40 | 0.30 | 0.97 | 0.90 | 9.01  | 9.97  | 9.50  | 9.37  | 9.33  |
| Pwwp2b     | 1.56 | 0.07 | 1.35 | 0.20 | 0.94 | 0.65 | 7.41  | 8.06  | 7.85  | 7.65  | 7.55  |
| Rapgef1    | 1.52 | 0.04 | 1.11 | 0.58 | 1.29 | 0.12 | 10.46 | 11.06 | 10.61 | 10.11 | 10.48 |
| Rasl10a    | 3.02 | 0.02 | 1.76 | 0.18 | 1.41 | 0.37 | 8.32  | 9.91  | 9.14  | 8.49  | 8.98  |
| Rasl11b    | 2.09 | 0.07 | 1.46 | 0.32 | 1.48 | 0.24 | 10.00 | 11.07 | 10.54 | 10.24 | 10.81 |
| Rprml      | 2.19 | 0.11 | 1.55 | 0.35 | 0.97 | 0.93 | 9.92  | 11.05 | 10.55 | 10.43 | 10.38 |
| Rspo2      | 1.70 | 0.10 | 1.25 | 0.47 | 1.21 | 0.33 | 6.05  | 6.81  | 6.36  | 5.86  | 6.14  |
| Scn1a      | 0.59 | 0.06 | 0.84 | 0.51 | 1.20 | 0.43 | 9.13  | 8.36  | 8.88  | 9.05  | 9.32  |
| Slc16a8    | 0.64 | 0.01 | 0.67 | 0.02 | 1.30 | 0.43 | 6.38  | 5.74  | 5.81  | 6.36  | 6.74  |
| Slc17a7    | 2.73 | 0.07 | 1.57 | 0.39 | 2.04 | 0.14 | 9.45  | 10.90 | 10.10 | 9.87  | 10.90 |
| Slc26a4    | 1.57 | 0.10 | 1.14 | 0.61 | 1.43 | 0.01 | 6.87  | 7.52  | 7.06  | 6.77  | 7.29  |
| Slc4a2     | 0.64 | 0.01 | 0.78 | 0.13 | 1.06 | 0.76 | 9.91  | 9.26  | 9.54  | 9.86  | 9.94  |
| Sostdc1    | 0.26 | 0.02 | 0.24 | 0.01 | 1.20 | 0.70 | 9.19  | 7.27  | 7.14  | 7.90  | 8.16  |
| Sstr2      | 1.65 | 0.03 | 1.43 | 0.10 | 1.38 | 0.12 | 7.95  | 8.67  | 8.46  | 7.35  | 7.82  |
| St6galnac2 | 0.67 | 0.02 | 0.62 | 0.01 | 0.99 | 0.95 | 8.30  | 7.72  | 7.61  | 7.59  | 7.57  |

|         |      |      |      |      |      |      |       |       |       |       |       |
|---------|------|------|------|------|------|------|-------|-------|-------|-------|-------|
| Stac2   | 1.79 | 0.06 | 1.51 | 0.17 | 1.33 | 0.30 | 9.09  | 9.93  | 9.69  | 8.95  | 9.37  |
| Tbr1    | 3.19 | 0.08 | 1.71 | 0.39 | 1.95 | 0.30 | 7.73  | 9.40  | 8.51  | 7.60  | 8.57  |
| Tcf19   | 1.57 | 0.10 | 1.44 | 0.17 | 1.13 | 0.50 | 6.50  | 7.14  | 7.03  | 6.51  | 6.68  |
| Tmem178 | 1.72 | 0.09 | 1.26 | 0.43 | 1.29 | 0.39 | 8.55  | 9.33  | 8.88  | 8.35  | 8.73  |
| Tshz2   | 0.66 | 0.05 | 0.81 | 0.28 | 0.97 | 0.88 | 7.24  | 6.65  | 6.93  | 7.22  | 7.19  |
| Tuba8   | 1.50 | 0.04 | 1.32 | 0.13 | 1.24 | 0.21 | 6.68  | 7.27  | 7.08  | 6.67  | 6.98  |
| Unc13c  | 0.61 | 0.06 | 0.78 | 0.31 | 0.70 | 0.01 | 10.28 | 9.57  | 9.92  | 10.36 | 9.85  |
| Wfdc2   | 0.39 | 0.01 | 0.42 | 0.01 | 1.28 | 0.67 | 7.87  | 6.49  | 6.62  | 7.36  | 7.72  |
| Wipf3   | 2.09 | 0.08 | 1.27 | 0.54 | 0.88 | 0.58 | 10.77 | 11.83 | 11.11 | 11.30 | 11.12 |
| Xlr4a   | 0.71 | 0.17 | 1.13 | 0.60 | 1.42 | 0.31 | 9.06  | 8.57  | 9.23  | 9.09  | 9.60  |
| Ypel1   | 1.72 | 0.06 | 1.31 | 0.31 | 1.07 | 0.77 | 7.24  | 8.02  | 7.63  | 7.23  | 7.33  |
| Zfp238  | 1.96 | 0.03 | 1.40 | 0.25 | 1.35 | 0.29 | 8.93  | 9.89  | 9.42  | 9.22  | 9.65  |
