# Supplementary material for: A Pharmacogenetic Discovery: Cystamine Protects Against Haloperidol-Induced Toxicity and Ischemic Brain Injury
Source: Oxford University Press journal article supplement (doi:10.1534/genetics.115.184648), 2016-03-19
Supplement: tables3.pdf [file tables3.pdf]

**Table S3. Strain-specific haloperidol-induced gene expression changes in striatal tissue.** Genes whose expression level had a haloperidol-induced absolute fold change >1.5 in striatal tissue of A/J mice (relative to that of C57BL/6), which also had adjusted p-value <0.1 in the (strain \* treatment) interaction analysis are listed. The fold change (FC) and p-values for each of the indicated pair-wise comparisons, as well as the quantile-normalized raw intensity microarray data for each gene in the indicated treatment group are shown. The treatment groups were: Hal: haloperidol; Cys+Hal: cystamine and haloperidol co-administration; ctrl: vehicle control.

| Symbol        | A/J_Hal_vs_Ctrl |         | A/J_CysHal_vs_Ctrl |         | C57BL/6_Hal_vs_Ctrl |         | Normalized Intensity |         |            |              |             |
|---------------|-----------------|---------|--------------------|---------|---------------------|---------|----------------------|---------|------------|--------------|-------------|
|               | FC              | p_value | FC                 | p_value | FC                  | p_value | A/J_Ctrl             | A/J_Hal | A/J_CysHal | C57BL/6_Ctrl | C57BL/6_Hal |
| 1110059M19Rik | 0.58            | 0.02    | 0.62               | 0.02    | 1.16                | 0.02    | 6.62                 | 5.84    | 5.93       | 6.48         | 6.69        |
| 1500015O10Rik | 0.32            | 0.07    | 0.26               | 0.07    | 1.43                | 0.07    | 9.43                 | 7.80    | 7.49       | 8.86         | 9.38        |
| 2010001M06Rik | 1.23            | 0.30    | 1.23               | 0.30    | 0.74                | 0.30    | 6.63                 | 6.93    | 6.93       | 7.21         | 6.76        |
| 2010300C02Rik | 2.00            | 0.15    | 1.30               | 0.15    | 0.79                | 0.15    | 9.87                 | 10.87   | 10.25      | 10.59        | 10.25       |
| 2610017I09Rik | 1.37            | 0.14    | 1.31               | 0.14    | 0.79                | 0.14    | 9.15                 | 9.60    | 9.54       | 9.53         | 9.19        |
| 2610304F08Rik | 0.76            | 0.13    | 0.87               | 0.13    | 1.35                | 0.13    | 6.30                 | 5.90    | 6.10       | 6.16         | 6.59        |
| 2810046M22Rik | 0.59            | 0.08    | 0.63               | 0.08    | 1.67                | 0.08    | 7.32                 | 6.56    | 6.65       | 6.81         | 7.54        |
| 2900017F05Rik | 0.54            | 0.03    | 0.71               | 0.03    | 1.29                | 0.03    | 7.56                 | 6.66    | 7.06       | 7.73         | 8.10        |
| 3110047P20Rik | 0.71            | 0.20    | 0.84               | 0.20    | 1.29                | 0.20    | 8.73                 | 8.24    | 8.48       | 8.33         | 8.70        |
| 4632401N01Rik | 1.38            | 0.19    | 1.11               | 0.19    | 0.82                | 0.19    | 8.60                 | 9.06    | 8.74       | 8.78         | 8.50        |
| 5330423N11Rik | 0.76            | 0.05    | 0.75               | 0.05    | 1.17                | 0.05    | 6.41                 | 6.02    | 6.00       | 6.70         | 6.93        |
| 8030481K01Rik | 1.20            | 0.27    | 1.17               | 0.27    | 0.80                | 0.27    | 6.80                 | 7.05    | 7.02       | 7.12         | 6.80        |
| 8430408G22Rik | 1.13            | 0.21    | 1.01               | 0.21    | 0.74                | 0.21    | 6.01                 | 6.19    | 6.01       | 6.08         | 5.65        |
| 9130230N09Rik | 1.07            | 0.73    | 1.09               | 0.73    | 0.68                | 0.73    | 7.10                 | 7.20    | 7.22       | 7.56         | 7.01        |
| 9330102G19Rik | 0.82            | 0.46    | 1.01               | 0.46    | 1.33                | 0.46    | 7.03                 | 6.74    | 7.04       | 6.62         | 7.03        |
| 9430020K01Rik | 1.18            | 0.36    | 1.01               | 0.36    | 0.76                | 0.36    | 6.64                 | 6.87    | 6.64       | 6.97         | 6.57        |
| A130082M07Rik | 0.58            | 0.09    | 0.72               | 0.09    | 1.00                | 0.09    | 7.14                 | 6.34    | 6.65       | 6.35         | 6.34        |
| A230077I10Rik | 0.74            | 0.10    | 0.83               | 0.10    | 1.11                | 0.10    | 7.04                 | 6.61    | 6.77       | 7.25         | 7.40        |
| A430103B12Rik | 0.59            | 0.03    | 0.74               | 0.03    | 1.07                | 0.03    | 7.94                 | 7.18    | 7.50       | 7.64         | 7.73        |
| A430106G13Rik | 0.81            | 0.09    | 0.85               | 0.09    | 1.22                | 0.09    | 7.71                 | 7.41    | 7.48       | 7.65         | 7.94        |
| A530079E22Rik | 1.25            | 0.37    | 1.16               | 0.37    | 0.74                | 0.37    | 6.76                 | 7.08    | 6.98       | 7.20         | 6.77        |
| A830055I09Rik | 0.89            | 0.31    | 0.97               | 0.31    | 1.56                | 0.31    | 8.00                 | 7.83    | 7.96       | 7.30         | 7.94        |
| A930006J02Rik | 0.69            | 0.09    | 0.81               | 0.09    | 1.05                | 0.09    | 6.25                 | 5.71    | 5.94       | 5.67         | 5.73        |
| A930040K03Rik | 1.29            | 0.11    | 1.16               | 0.11    | 0.84                | 0.11    | 5.86                 | 6.23    | 6.08       | 6.15         | 5.90        |
| Actn1         | 1.45            | 0.23    | 1.11               | 0.23    | 0.72                | 0.23    | 10.61                | 11.14   | 10.76      | 10.97        | 10.49       |
| Actn2         | 1.58            | 0.47    | 1.22               | 0.47    | 0.53                | 0.47    | 10.08                | 10.75   | 10.37      | 10.92        | 10.01       |
| Adamts15      | 0.73            | 0.14    | 0.89               | 0.14    | 1.10                | 0.14    | 6.70                 | 6.25    | 6.53       | 6.27         | 6.40        |
| Adcyap1       | 0.58            | 0.12    | 0.78               | 0.12    | 1.39                | 0.12    | 8.18                 | 7.39    | 7.81       | 7.48         | 7.96        |

|               |      |      |      |      |      |      |       |       |       |       |       |
|---------------|------|------|------|------|------|------|-------|-------|-------|-------|-------|
| Ahnak2        | 0.74 | 0.14 | 0.92 | 0.14 | 1.11 | 0.14 | 7.16  | 6.73  | 7.04  | 6.76  | 6.91  |
| Akap2         | 0.75 | 0.14 | 0.79 | 0.14 | 1.22 | 0.14 | 7.87  | 7.45  | 7.54  | 7.58  | 7.87  |
| Amn           | 0.86 | 0.26 | 1.03 | 0.26 | 1.29 | 0.26 | 8.55  | 8.32  | 8.60  | 8.32  | 8.69  |
| Ankrd37       | 1.11 | 0.41 | 1.13 | 0.41 | 0.67 | 0.41 | 7.52  | 7.67  | 7.70  | 7.90  | 7.32  |
| Aqp1          | 0.47 | 0.01 | 0.45 | 0.01 | 1.47 | 0.01 | 7.38  | 6.29  | 6.24  | 6.84  | 7.40  |
| Arc           | 1.65 | 0.16 | 1.04 | 0.16 | 0.60 | 0.16 | 9.12  | 9.85  | 9.19  | 9.74  | 9.01  |
| Arg2          | 1.50 | 0.21 | 1.57 | 0.21 | 0.83 | 0.21 | 6.78  | 7.37  | 7.44  | 7.41  | 7.15  |
| Asah3l        | 1.26 | 0.09 | 1.29 | 0.09 | 0.81 | 0.09 | 8.20  | 8.53  | 8.56  | 7.56  | 7.25  |
| B230343A10Rik | 1.49 | 0.24 | 1.11 | 0.24 | 0.83 | 0.24 | 11.82 | 12.39 | 11.97 | 11.65 | 11.38 |
| Baiap2        | 1.66 | 0.22 | 1.24 | 0.22 | 0.78 | 0.22 | 8.19  | 8.92  | 8.50  | 8.42  | 8.07  |
| BC042720      | 0.76 | 0.10 | 0.76 | 0.10 | 1.18 | 0.10 | 8.91  | 8.51  | 8.52  | 8.93  | 9.17  |
| Bcr           | 1.23 | 0.39 | 1.23 | 0.39 | 0.75 | 0.39 | 7.29  | 7.59  | 7.59  | 7.58  | 7.16  |
| C030011O14Rik | 0.72 | 0.04 | 0.86 | 0.04 | 1.15 | 0.04 | 8.30  | 7.83  | 8.09  | 7.87  | 8.07  |
| C130060K24Rik | 1.25 | 0.19 | 1.05 | 0.19 | 0.78 | 0.19 | 7.44  | 7.76  | 7.51  | 7.56  | 7.21  |
| C130090G16Rik | 0.83 | 0.04 | 1.05 | 0.04 | 1.31 | 0.04 | 7.96  | 7.69  | 8.03  | 7.48  | 7.87  |
| C230081G24Rik | 0.83 | 0.20 | 0.96 | 0.20 | 1.53 | 0.20 | 8.66  | 8.39  | 8.60  | 8.21  | 8.83  |
| C230098O21Rik | 1.54 | 0.27 | 1.16 | 0.27 | 0.77 | 0.27 | 11.51 | 12.13 | 11.72 | 11.93 | 11.56 |
| Cab39l        | 0.78 | 0.04 | 0.81 | 0.04 | 1.19 | 0.04 | 9.35  | 8.99  | 9.05  | 9.44  | 9.70  |
| Calml4        | 0.55 | 0.08 | 0.62 | 0.08 | 1.21 | 0.08 | 7.60  | 6.74  | 6.91  | 7.21  | 7.48  |
| Camkv         | 1.29 | 0.20 | 1.10 | 0.20 | 0.81 | 0.20 | 11.47 | 11.84 | 11.61 | 11.70 | 11.40 |
| Car14         | 0.63 | 0.01 | 0.71 | 0.01 | 1.05 | 0.01 | 8.28  | 7.61  | 7.78  | 8.33  | 8.41  |
| Cbln4         | 0.81 | 0.36 | 1.14 | 0.36 | 1.41 | 0.36 | 9.35  | 9.05  | 9.54  | 8.91  | 9.40  |
| Cbr3          | 1.64 | 0.25 | 1.36 | 0.25 | 0.72 | 0.25 | 9.10  | 9.81  | 9.54  | 9.66  | 9.19  |
| Ccng2         | 1.36 | 0.07 | 1.14 | 0.07 | 0.83 | 0.07 | 7.76  | 8.20  | 7.95  | 8.07  | 7.80  |
| Cd72          | 1.41 | 0.11 | 1.26 | 0.11 | 0.76 | 0.11 | 5.91  | 6.41  | 6.24  | 6.81  | 6.42  |
| Cdca7         | 1.25 | 0.28 | 1.14 | 0.28 | 0.83 | 0.28 | 7.61  | 7.93  | 7.80  | 7.92  | 7.65  |
| Cdkn1c        | 0.61 | 0.02 | 0.68 | 0.02 | 1.35 | 0.02 | 9.58  | 8.88  | 9.03  | 8.90  | 9.34  |
| Centg1        | 1.46 | 0.14 | 1.11 | 0.14 | 0.87 | 0.14 | 9.20  | 9.75  | 9.35  | 9.26  | 9.05  |
| Chst8         | 0.63 | 0.24 | 0.81 | 0.24 | 1.32 | 0.24 | 10.13 | 9.45  | 9.82  | 9.96  | 10.36 |
| Cirbp         | 0.82 | 0.09 | 0.91 | 0.09 | 1.25 | 0.09 | 9.69  | 9.41  | 9.56  | 9.30  | 9.62  |
| Cit           | 0.54 | 0.06 | 0.80 | 0.06 | 1.01 | 0.06 | 8.27  | 7.38  | 7.94  | 8.01  | 8.03  |
| Cldn2         | 0.44 | 0.01 | 0.43 | 0.01 | 1.21 | 0.01 | 7.18  | 5.99  | 5.97  | 6.72  | 7.00  |
| Clspn         | 1.19 | #N/A | 1.04 | #N/A | 0.54 | #N/A | 6.30  | 6.55  | 6.36  | 7.37  | 6.49  |
| Cntn2         | 0.71 | 0.03 | 0.91 | 0.03 | 1.11 | 0.03 | 9.26  | 8.77  | 9.13  | 7.49  | 7.65  |
| Col8a1        | 0.67 | 0.04 | 0.72 | 0.04 | 1.33 | 0.04 | 6.92  | 6.34  | 6.45  | 6.66  | 7.08  |
| Col8a2        | 0.61 | 0.04 | 0.63 | 0.04 | 1.17 | 0.04 | 7.19  | 6.48  | 6.53  | 6.61  | 6.83  |

|               |      |      |      |      |      |      |       |       |       |       |       |
|---------------|------|------|------|------|------|------|-------|-------|-------|-------|-------|
| Creg1         | 0.74 | 0.16 | 0.91 | 0.16 | 1.14 | 0.16 | 8.44  | 8.01  | 8.30  | 8.20  | 8.38  |
| Crtc1         | 1.31 | 0.16 | 1.14 | 0.16 | 0.86 | 0.16 | 8.34  | 8.73  | 8.53  | 8.36  | 8.14  |
| Csnrp3        | 1.46 | 0.22 | 1.12 | 0.22 | 0.81 | 0.22 | 8.57  | 9.12  | 8.73  | 9.04  | 8.73  |
| D230046H12Rik | 0.43 | 0.03 | 0.52 | 0.03 | 1.22 | 0.03 | 9.28  | 8.07  | 8.33  | 8.83  | 9.11  |
| D3Bwg0562e    | 1.29 | 0.14 | 1.29 | 0.14 | 0.76 | 0.14 | 8.71  | 9.08  | 9.08  | 9.75  | 9.35  |
| Ddn           | 2.02 | 0.18 | 1.16 | 0.18 | 0.81 | 0.18 | 12.60 | 13.62 | 12.82 | 13.04 | 12.74 |
| Ddx11         | 1.19 | 0.36 | 1.03 | 0.36 | 0.78 | 0.36 | 6.74  | 7.00  | 6.79  | 6.83  | 6.48  |
| Dmkn          | 1.30 | 0.22 | 1.15 | 0.22 | 0.66 | 0.22 | 7.49  | 7.87  | 7.69  | 8.76  | 8.16  |
| Doc2b         | 1.22 | 0.24 | 1.14 | 0.24 | 0.74 | 0.24 | 9.05  | 9.34  | 9.24  | 9.25  | 8.81  |
| Dok3          | 0.95 | 0.51 | 0.93 | 0.51 | 0.62 | 0.51 | 8.20  | 8.13  | 8.09  | 8.86  | 8.16  |
| E030007N04Rik | 0.84 | 0.18 | 0.97 | 0.18 | 1.26 | 0.18 | 8.71  | 8.46  | 8.67  | 8.30  | 8.63  |
| Efnb2         | 1.15 | 0.41 | 1.03 | 0.41 | 0.77 | 0.41 | 6.33  | 6.53  | 6.37  | 6.35  | 5.97  |
| EG545758      | 1.11 | 0.47 | 0.95 | 0.47 | 0.60 | 0.47 | 7.54  | 7.69  | 7.46  | 7.74  | 6.99  |
| Egr1          | 1.41 | 0.31 | 1.00 | 0.31 | 0.69 | 0.31 | 11.89 | 12.38 | 11.89 | 12.52 | 11.98 |
| Egr2          | 1.57 | 0.21 | 1.24 | 0.21 | 0.70 | 0.21 | 6.88  | 7.53  | 7.19  | 7.39  | 6.88  |
| Egr4          | 2.07 | 0.13 | 1.54 | 0.13 | 0.74 | 0.13 | 8.39  | 9.44  | 9.02  | 9.36  | 8.94  |
| Enpp2         | 0.44 | 0.01 | 0.55 | 0.01 | 1.28 | 0.01 | 10.90 | 9.73  | 10.05 | 10.55 | 10.90 |
| Erf           | 1.22 | 0.31 | 1.01 | 0.31 | 0.74 | 0.31 | 6.89  | 7.18  | 6.91  | 7.13  | 6.70  |
| F830002E14Rik | 0.52 | 0.01 | 0.25 | 0.01 | 1.35 | 0.01 | 10.87 | 9.93  | 8.84  | 9.78  | 10.22 |
| Fam171a1      | 2.10 | 0.01 | 2.08 | 0.01 | 0.75 | 0.01 | 6.85  | 7.92  | 7.90  | 7.42  | 7.01  |
| Fam20b        | 0.80 | 0.15 | 0.99 | 0.15 | 1.32 | 0.15 | 9.01  | 8.68  | 9.00  | 7.19  | 7.59  |
| Folr1         | 0.37 | 0.01 | 0.38 | 0.01 | 1.29 | 0.01 | 7.76  | 6.34  | 6.38  | 7.17  | 7.54  |
| Fos           | 1.13 | 0.51 | 1.04 | 0.51 | 0.68 | 0.51 | 8.14  | 8.31  | 8.20  | 8.33  | 7.76  |
| Fosb          | 1.88 | 0.02 | 1.46 | 0.02 | 1.06 | 0.02 | 7.37  | 8.28  | 7.91  | 7.34  | 7.43  |
| Foxg1         | 1.65 | 0.22 | 1.13 | 0.22 | 0.77 | 0.22 | 8.48  | 9.21  | 8.66  | 8.88  | 8.51  |
| Gabra3        | 0.97 | 0.82 | 0.77 | 0.82 | 1.46 | 0.82 | 7.80  | 7.77  | 7.43  | 7.24  | 7.79  |
| Gas7          | 1.27 | 0.25 | 1.07 | 0.25 | 0.77 | 0.25 | 8.24  | 8.59  | 8.34  | 8.78  | 8.40  |
| Gipc2         | 1.18 | 0.39 | 1.09 | 0.39 | 0.77 | 0.39 | 6.54  | 6.77  | 6.66  | 6.93  | 6.54  |
| Gpr123        | 0.77 | 0.23 | 0.94 | 0.23 | 1.19 | 0.23 | 9.92  | 9.55  | 9.82  | 9.70  | 9.95  |
| Gpr155        | 1.36 | 0.22 | 1.21 | 0.22 | 0.72 | 0.22 | 9.54  | 9.98  | 9.81  | 10.07 | 9.60  |
| Hba-a1        | 1.07 | 0.65 | 0.90 | 0.65 | 0.70 | 0.65 | 12.61 | 12.71 | 12.47 | 12.86 | 12.35 |
| Hbb-b1        | 1.05 | 0.76 | 1.00 | 0.76 | 0.67 | 0.76 | 11.67 | 11.73 | 11.66 | 12.87 | 12.29 |
| Hes5          | 1.18 | 0.14 | 0.95 | 0.14 | 0.72 | 0.14 | 7.36  | 7.60  | 7.28  | 8.00  | 7.54  |
| Hmgcs2        | 1.08 | 0.65 | 1.00 | 0.65 | 0.68 | 0.65 | 8.34  | 8.45  | 8.34  | 8.40  | 7.84  |
| Hook3         | 0.79 | 0.05 | 0.77 | 0.05 | 1.32 | 0.05 | 6.57  | 6.23  | 6.19  | 6.18  | 6.58  |
| Hpca          | 1.77 | 0.24 | 1.18 | 0.24 | 0.70 | 0.24 | 13.00 | 13.82 | 13.23 | 13.47 | 12.95 |

|              |      |      |      |      |      |      |       |       |       |       |       |
|--------------|------|------|------|------|------|------|-------|-------|-------|-------|-------|
| Icam5        | 1.98 | 0.15 | 1.40 | 0.15 | 0.80 | 0.15 | 9.06  | 10.04 | 9.55  | 9.58  | 9.26  |
| Ii17rc       | 1.07 | 0.63 | 1.07 | 0.63 | 0.71 | 0.63 | 6.98  | 7.08  | 7.08  | 7.41  | 6.93  |
| Inmt         | 0.68 | 0.14 | 0.66 | 0.14 | 1.28 | 0.14 | 7.34  | 6.78  | 6.74  | 7.85  | 8.20  |
| Iqsec2       | 1.37 | 0.17 | 1.07 | 0.17 | 0.89 | 0.17 | 8.48  | 8.94  | 8.58  | 8.49  | 8.32  |
| Irs2         | 0.59 | 0.04 | 0.87 | 0.04 | 1.10 | 0.04 | 9.51  | 8.74  | 9.32  | 9.15  | 9.29  |
| Itga5        | 1.27 | 0.35 | 1.31 | 0.35 | 0.78 | 0.35 | 6.29  | 6.63  | 6.69  | 6.57  | 6.22  |
| Kcnip4       | 0.81 | 0.04 | 0.79 | 0.04 | 1.38 | 0.04 | 6.78  | 6.47  | 6.43  | 6.41  | 6.88  |
| Kcnk2        | 1.32 | 0.28 | 1.27 | 0.28 | 0.75 | 0.28 | 8.22  | 8.62  | 8.57  | 8.79  | 8.36  |
| Kcnma1       | 0.84 | 0.19 | 1.06 | 0.19 | 1.29 | 0.19 | 9.03  | 8.78  | 9.11  | 8.83  | 9.20  |
| Klf6         | 0.67 | 0.09 | 0.78 | 0.09 | 1.28 | 0.09 | 8.75  | 8.18  | 8.40  | 8.37  | 8.73  |
| Kndc1        | 0.75 | 0.25 | 0.87 | 0.25 | 1.17 | 0.25 | 10.53 | 10.12 | 10.32 | 10.40 | 10.62 |
| Krt10        | 1.28 | 0.35 | 1.18 | 0.35 | 0.66 | 0.35 | 10.02 | 10.38 | 10.27 | 10.76 | 10.17 |
| Krt18        | 0.67 | 0.03 | 0.71 | 0.03 | 1.16 | 0.03 | 6.28  | 5.71  | 5.79  | 6.17  | 6.39  |
| Limd2        | 1.42 | 0.04 | 1.15 | 0.04 | 0.93 | 0.04 | 6.40  | 6.91  | 6.60  | 6.54  | 6.45  |
| Lingo3       | 1.38 | 0.32 | 1.33 | 0.32 | 0.78 | 0.32 | 6.67  | 7.13  | 7.08  | 6.99  | 6.63  |
| LOC100040243 | 0.74 | 0.06 | 0.91 | 0.06 | 1.13 | 0.06 | 9.26  | 8.83  | 9.13  | 9.30  | 9.48  |
| LOC100041569 | 0.70 | 0.18 | 0.92 | 0.18 | 1.27 | 0.18 | 9.06  | 8.54  | 8.94  | 8.77  | 9.11  |
| LOC100043257 | 1.09 | 0.34 | 0.88 | 0.34 | 1.93 | 0.34 | 10.38 | 10.50 | 10.20 | 10.12 | 11.07 |
| LOC331102    | 0.78 | 0.04 | 0.64 | 0.04 | 1.18 | 0.04 | 10.89 | 10.53 | 10.24 | 10.43 | 10.67 |
| LOC381739    | 0.85 | 0.17 | 0.96 | 0.17 | 1.32 | 0.17 | 9.41  | 9.17  | 9.36  | 8.39  | 8.79  |
| LOC547380    | 0.71 | 0.02 | 0.94 | 0.02 | 1.12 | 0.02 | 7.50  | 7.02  | 7.41  | 7.36  | 7.52  |
| LOC671878    | 0.72 | 0.13 | 0.89 | 0.13 | 1.24 | 0.13 | 9.56  | 9.08  | 9.39  | 9.39  | 9.70  |
| Lypd1        | 1.14 | 0.45 | 1.01 | 0.45 | 0.73 | 0.45 | 10.56 | 10.75 | 10.57 | 9.85  | 9.41  |
| Mog          | 0.67 | 0.03 | 0.81 | 0.03 | 1.01 | 0.03 | 10.38 | 9.80  | 10.08 | 10.55 | 10.56 |
| Mreg         | 0.80 | 0.37 | 0.95 | 0.37 | 1.24 | 0.37 | 8.14  | 7.81  | 8.07  | 7.74  | 8.06  |
| Myo5b        | 1.79 | 0.19 | 1.10 | 0.19 | 0.89 | 0.19 | 8.14  | 8.97  | 8.27  | 8.26  | 8.10  |
| Ncor1        | 1.83 | 0.01 | 1.84 | 0.01 | 0.91 | 0.01 | 8.39  | 9.26  | 9.26  | 8.58  | 8.45  |
| Nrgn         | 2.64 | 0.10 | 1.70 | 0.10 | 0.85 | 0.10 | 10.83 | 12.23 | 11.59 | 11.71 | 11.47 |
| Obfc1        | 1.23 | 0.16 | 1.13 | 0.16 | 0.81 | 0.16 | 7.41  | 7.71  | 7.58  | 7.26  | 6.96  |
| Pcmt2        | 1.26 | 0.04 | 1.16 | 0.04 | 0.83 | 0.04 | 7.46  | 7.80  | 7.68  | 7.67  | 7.40  |
| Pde2a        | 1.69 | 0.16 | 1.29 | 0.16 | 0.78 | 0.16 | 9.82  | 10.57 | 10.19 | 10.24 | 9.88  |
| Peg3         | 0.57 | 0.02 | 0.83 | 0.02 | 1.09 | 0.02 | 9.81  | 8.99  | 9.53  | 9.71  | 9.84  |
| Phyhip       | 1.52 | 0.15 | 1.14 | 0.15 | 0.85 | 0.15 | 8.10  | 8.71  | 8.30  | 8.24  | 8.00  |
| Pigz         | 0.73 | 0.06 | 0.91 | 0.06 | 1.16 | 0.06 | 8.97  | 8.52  | 8.84  | 9.15  | 9.35  |
| Pmch         | 0.10 | 0.08 | 0.46 | 0.08 | 1.60 | 0.08 | 9.61  | 6.32  | 8.50  | 9.26  | 9.94  |
| Ppm1l        | 0.79 | 0.10 | 0.96 | 0.10 | 1.34 | 0.10 | 7.96  | 7.63  | 7.90  | 8.00  | 8.43  |

|                 |      |      |      |      |      |      |       |       |       |       |       |
|-----------------|------|------|------|------|------|------|-------|-------|-------|-------|-------|
| Ppp1r3f         | 0.77 | 0.15 | 0.85 | 0.15 | 1.18 | 0.15 | 9.65  | 9.28  | 9.42  | 9.29  | 9.53  |
| Prlr            | 0.58 | 0.14 | 0.64 | 0.14 | 1.19 | 0.14 | 7.61  | 6.82  | 6.96  | 7.50  | 7.75  |
| Ptk2b           | 1.94 | 0.06 | 1.40 | 0.06 | 0.97 | 0.06 | 9.01  | 9.97  | 9.50  | 9.37  | 9.33  |
| Pwwp2b          | 1.56 | 0.07 | 1.35 | 0.07 | 0.94 | 0.07 | 7.41  | 8.06  | 7.85  | 7.65  | 7.55  |
| Rerg            | 1.34 | 0.28 | 1.41 | 0.28 | 0.78 | 0.28 | 9.18  | 9.60  | 9.67  | 9.11  | 8.75  |
| Rgl1            | 1.38 | 0.08 | 1.08 | 0.08 | 0.92 | 0.08 | 9.60  | 10.07 | 9.71  | 9.46  | 9.34  |
| Rgs12           | 1.43 | 0.08 | 0.98 | 0.08 | 0.94 | 0.08 | 7.83  | 8.34  | 7.80  | 7.71  | 7.62  |
| Rhbdl3          | 1.13 | 0.38 | 1.01 | 0.38 | 0.73 | 0.38 | 8.51  | 8.69  | 8.53  | 8.34  | 7.88  |
| Rims3           | 0.71 | 0.13 | 0.97 | 0.13 | 1.08 | 0.13 | 12.32 | 11.83 | 12.28 | 12.24 | 12.36 |
| Rin1            | 1.98 | 0.18 | 1.26 | 0.18 | 0.82 | 0.18 | 9.31  | 10.29 | 9.63  | 9.54  | 9.25  |
| Rora            | 0.65 | 0.19 | 0.90 | 0.19 | 1.23 | 0.19 | 8.84  | 8.22  | 8.70  | 8.89  | 9.19  |
| Ryr1            | 1.40 | 0.35 | 1.17 | 0.35 | 0.60 | 0.35 | 7.22  | 7.71  | 7.45  | 8.14  | 7.39  |
| Sap30           | 1.29 | 0.09 | 1.18 | 0.09 | 0.85 | 0.09 | 8.76  | 9.13  | 9.00  | 9.08  | 8.85  |
| scl0001379.1_70 | 1.46 | 0.31 | 1.25 | 0.31 | 0.73 | 0.31 | 8.22  | 8.77  | 8.54  | 8.59  | 8.13  |
| scl0002785.1_49 | 0.63 | 0.16 | 0.82 | 0.16 | 1.09 | 0.16 | 8.50  | 7.83  | 8.21  | 8.26  | 8.39  |
| Scn1a           | 0.59 | 0.06 | 0.84 | 0.06 | 1.20 | 0.06 | 9.13  | 8.36  | 8.88  | 9.05  | 9.32  |
| Slc16a8         | 0.64 | 0.01 | 0.67 | 0.01 | 1.30 | 0.01 | 6.38  | 5.74  | 5.81  | 6.36  | 6.74  |
| Slc4a2          | 0.64 | 0.01 | 0.78 | 0.01 | 1.06 | 0.01 | 9.91  | 9.26  | 9.54  | 9.86  | 9.94  |
| Smpd3           | 1.46 | 0.35 | 1.22 | 0.35 | 0.69 | 0.35 | 10.07 | 10.61 | 10.36 | 10.36 | 9.82  |
| Snx30           | 0.75 | 0.02 | 0.90 | 0.02 | 1.14 | 0.02 | 8.18  | 7.76  | 8.03  | 7.17  | 7.36  |
| Sostdc1         | 0.26 | 0.02 | 0.24 | 0.02 | 1.20 | 0.02 | 9.19  | 7.27  | 7.14  | 7.90  | 8.16  |
| Spata13         | 1.49 | 0.27 | 1.25 | 0.27 | 0.91 | 0.27 | 10.17 | 10.75 | 10.50 | 9.88  | 9.75  |
| Spata2L         | 1.45 | 0.21 | 1.10 | 0.21 | 0.70 | 0.21 | 9.56  | 10.10 | 9.70  | 9.92  | 9.39  |
| Spint1          | 1.35 | 0.24 | 1.19 | 0.24 | 0.88 | 0.24 | 7.42  | 7.85  | 7.67  | 8.30  | 8.11  |
| Srf             | 1.42 | 0.04 | 1.12 | 0.04 | 0.92 | 0.04 | 8.61  | 9.11  | 8.76  | 8.78  | 8.66  |
| Srfbp1          | 0.96 | 0.56 | 0.93 | 0.56 | 0.80 | 0.56 | 7.64  | 7.59  | 7.53  | 7.70  | 7.38  |
| Tcea3           | 0.75 | 0.03 | 0.80 | 0.03 | 1.13 | 0.03 | 6.44  | 6.02  | 6.11  | 6.43  | 6.60  |
| Tmem158         | 1.32 | 0.46 | 1.23 | 0.46 | 0.70 | 0.46 | 8.59  | 8.99  | 8.88  | 9.11  | 8.60  |
| Tnfrsf25        | 1.45 | #N/A | 1.04 | #N/A | 0.76 | #N/A | 6.30  | 6.83  | 6.36  | 6.69  | 6.31  |
| Tox             | 0.75 | #N/A | 0.87 | #N/A | 1.16 | #N/A | 8.68  | 8.26  | 8.48  | 8.18  | 8.40  |
| Trpm3           | 0.72 | 0.03 | 0.78 | 0.03 | 1.18 | 0.03 | 6.48  | 6.01  | 6.12  | 6.14  | 6.37  |
| Tr              | 0.31 | 0.18 | 0.10 | 0.18 | 1.86 | 0.18 | 14.56 | 12.85 | 11.17 | 13.30 | 14.19 |
| Upb1            | 1.11 | 0.56 | 1.06 | 0.56 | 0.71 | 0.56 | 6.29  | 6.44  | 6.37  | 6.85  | 6.36  |
| Wfdc2           | 0.39 | 0.01 | 0.42 | 0.01 | 1.28 | 0.01 | 7.87  | 6.49  | 6.62  | 7.36  | 7.72  |
| Wipf3           | 2.09 | 0.08 | 1.27 | 0.08 | 0.88 | 0.08 | 10.77 | 11.83 | 11.11 | 11.30 | 11.12 |
| Ybx3            | 0.85 | 0.13 | 0.89 | 0.13 | 1.75 | 0.13 | 8.81  | 8.57  | 8.63  | 7.80  | 8.60  |
