# Supplementary material for: A Pharmacogenetic Discovery: Cystamine Protects Against Haloperidol-Induced Toxicity and Ischemic Brain Injury
Source: Oxford University Press journal article supplement (doi:10.1534/genetics.115.184648), 2016-03-19
Supplement: tables4.pdf [file tables4.pdf]

**Table S4.** The 10 most highly enriched biological function categories for genes whose expression was altered in a strain-specific and cystamine-reversible manner by haloperidol treatment. The Ingenuity Pathway Analysis program was used to identify the biologic pathways associated with the 32 genes shown in table 1. The associated biological functions in the output are ranked by their p-values in ascending order. The numbers of genes, and the symbol for each gene, associated with each pathway are shown.

| Functional Annotation               | p-value  | # genes | Genes                                                       |
|-------------------------------------|----------|---------|-------------------------------------------------------------|
| Body size                           | 1.87E-06 | 10      | AQP1,<br>CA14,CDKN1C,FOSB,IRS2,NCOR1,PEG3,PMCH,SCN1A,SLC4A2 |
| White adipose tissue mass           | 6.04E-06 | 3       | ENPP2,IRS2,PMCH                                             |
| Perirenal white adipose tissue mass | 1.32E-05 | 2       | ENPP2,PMCH                                                  |
| Hyperphagia                         | 2.10E-05 | 4       | CA14,IRS2,PMCH,SCN1A                                        |
| Uterine serous papillary cancer     | 3.06E-05 | 5       | AQP1,CIT,ENPP2,PEG3,WFDC2                                   |
| Weight loss                         | 3.56E-05 | 5       | AQP1,IRS2,NCOR1,PMCH,SCN1A                                  |
| Neurotransmission                   | 5.42E-05 | 6       | ARC,FOSB,NRGN,PMCH,PTK2B,SCN1A                              |
| Movement Disorders                  | 6.38E-05 | 9       | AQP1,CA14,CDKN1C,CIT,FOSB,NRGN,PTK2B,SCN1A,SLC4A2           |
| Urination disorder                  | 8.03E-05 | 5       | AQP1,CDKN1C,CLDN2,IRS2,SCN1A                                |
| Polyuria                            | 9.38E-05 | 3       | AQP1,CLDN2,IRS2                                             |
