# Supplementary material for: A Pharmacogenetic Discovery: Cystamine Protects Against Haloperidol-Induced Toxicity and Ischemic Brain Injury
Source: Oxford University Press journal article supplement (doi:10.1534/genetics.115.184648), 2016-03-19
Supplement: tables5.pdf [file tables5.pdf]

**Table S5. RT-PCR analysis of striatal gene expression.** Nine genes were identified by microarray analysis as having haloperidol-induced expression changes in striatum that were strain-specific and reversible by cystamine co-administration. The mRNA levels for these 9 genes were analyzed by RT-PCR analysis in striatal tissue obtained from C57BL/6 or A/J mice treated with vehicle or olanzapine (5 mg/kg/day x 3 days PO). One group of olanzapine-treated A/J mice was also treated with cystamine (10 mg/kg BID IP). The fold change (FC) and p-values for each of the indicated comparisons are shown for the microarray and RT-PCR data are shown. ND: not determined. The mRNAs for 3 genes (*Pmch*, *Fosb*, and *Slc4a2*) whose haloperidol-induced expression changes in A/J striatal tissue measured by RT-PCR that had p-values <0.05 are shown in red. A (-) sign indicates that the mRNA was down regulated. The treatment groups are: Hal: haloperidol; Cys+Hal: cystamine and haloperidol co-administration; Ctrl: vehicle control; ND: not determined.

| Gene          | Microarray      |                     |                     | RT-PCR          |                    |                     |
|---------------|-----------------|---------------------|---------------------|-----------------|--------------------|---------------------|
|               | A/J Hal vs Ctrl | A/J Cys+Hal_vs_Ctrl | C57BL/6 Hal_vs_Ctrl | A/J Hal_vs_Ctrl | A/J CysHal_vs_Ctrl | C57BL/6 Hal_vs_Ctrl |
| <i>Pmch</i>   | -9.77 (p=0.08)  | -2.16 (p=0.52)      | 1.60 (p=0.66)       | -61.5 (p=0.04)  | -4.0 (p=0.57)      | 2.10 (p=0.70)       |
| <i>Nrgn</i>   | 2.64 (p=0.10)   | 1.70 (p=0.35)       | -1.18 (p=0.69)      | 2.86 (p=0.12)   | 1.82 (p=0.47)      | ND                  |
| <i>Ptk2b</i>  | 1.94 (p=0.06)   | 1.40 (p=0.30)       | -1.03 (p=0.90)      | 1.81 (p=0.09)   | 1.41 (p=0.51)      | ND                  |
| <i>Fosb</i>   | 1.88 (p=0.02)   | 1.46 (p=0.14)       | 1.06 (p=0.68)       | 5.14 (p=0.003)  | 3.50 (p=0.07)      | 2.48 (p=0.08)       |
| <i>Cit</i>    | -1.86 (p=0.06)  | -1.25 (p=0.46)      | 1.01 (p=0.89)       | -1.76 (p=0.17)  | -1.23 (p=0.70)     | ND                  |
| <i>Peg3</i>   | -1.76 (p=0.02)  | -1.21 (p=0.39)      | 1.09 (p=0.49)       | -1.19 (p=0.78)  | 1.02 (p=0.98)      | ND                  |
| <i>Irs2</i>   | -1.71 (p=0.05)  | -1.15 (p=0.58)      | 1.10 (p=0.58)       | 1.02 (p=0.88)   | -1.02 (p=0.93)     | ND                  |
| <i>Scn1a</i>  | -1.70 (p=0.06)  | -1.19 (p=0.51)      | 1.20 (p=0.43)       | 1.09 (p=0.84)   | 1.29 (p=0.38)      | ND                  |
| <i>Slc4a2</i> | -1.56 (p=0.01)  | -1.29 (p=0.13)      | 1.06 (p=0.76)       | -1.55 (p=0.025) | -1.38 (p=0.16)     | 1.05 (p=0.77)       |
